# Supplementary material for: Controllable construction of highly active Ti species in TS-1 zeotype by organic base treatment
Source: Royal Society of Chemistry journal article supplement (doi:10.1039/d4cy01313a), 2024-12-19
Supplement: d4cy01313a1.pdf [file d4cy01313a1.pdf]

## Supplementary Material

### Controllable Construction of Highly Active Ti Species in TS-1 Zeolite by Organic Base-Treatment

**Shiqing Li<sup>1,2+</sup>, Jie Tuo<sup>2+</sup>, Rusi Peng<sup>1\*</sup>, Xianchen Gong<sup>2</sup>, Ying Ma<sup>1\*</sup>, Hao Xu<sup>2\*</sup>, Peng Wu<sup>2\*</sup>**

[+] Contributed equally to this paper.

<sup>1</sup> Key Laboratory of Green and Precise Synthetic Chemistry and Applications, Ministry of Education College of Chemistry and Materials Science, Huaibei Normal University, Huaibei, Anhui 235000 (China).

<sup>2</sup> Shanghai Key Laboratory of Green Chemistry and Chemical Processes, State Key Laboratory of Petroleum Molecular & Process Engineering, School of Chemistry and Molecular Engineering, East China Normal University, North Zhongshan Rd. 3663, Shanghai, 200062 (China).

### Characterization methods

Powder X-ray diffraction (XRD) patterns were recorded on a Rigaku Ultima IV diffractometer with a Ni-filtered CuK $\alpha$  X-ray source ( $\lambda = 1.541 \text{ \AA}$ ). Scanning electron microscopy (SEM) was carried out on a Hitachi S-4800 scanning electron microscope. Transmission electron microscopy (TEM) was taken on a JSM-2010F microscope. UV resonance Raman spectra were collected on a triple spectrograph Raman system UV-Raman-100 with 244 nm laser. The chemical compositions of sample were analyzed via inductively coupled plasma-atomic emission spectrometry (ICP-AES) on a Thermo IRIS Intrepid II XSP atomic emission spectrometer. The CHN elementary analysis was carried out on an Elementar Vario III instrument. N<sub>2</sub> and H<sub>2</sub>O physisorption measurements were performed on a BELSORP instrument at 77 K. The adsorption and diffusion properties of organic molecules were also measured by thermogravimetric analysis. The as-made samples (~5 mg) with organics were pretreated at 423 K for 2 h in a N<sub>2</sub> flow to remove adsorbed water until no mass loss was observed, while the pretreatment of calcined samples was performed at a higher temperature of 823 K to remove not only adsorbed water but also organic impurities. Then the sample was cooled to 333 K and the adsorption data were obtained according to the increased weight when the N<sub>2</sub> flow (30 mL min<sup>-1</sup>) together with organic vapor passing through the sample until the weight increase leveled off. The spectra in the framework vibration region and in the hydroxyl-stretching region were collected after evacuation at 473 K for 3 h. In order to eliminate the physically absorbed water, the self-supported sample wafers were placed in a quartz IR cell sealed with CaF<sub>2</sub> or KBr windows and evacuated through a vacuum system at 473 K for 3 h before measurements. X-ray photoelectron spectroscopy (XPS) was measured on the Kratos AXIS Supra equipment. UV-vis spectra were obtained on a PerkinElmer UV-vis Lambda 35 spectrophotometer using pure BaSO<sub>4</sub> as a reference. The <sup>13</sup>C and <sup>29</sup>Si solid MAS NMR spectra were performed on a VARIAN VNMRS-400WB spectrometer.

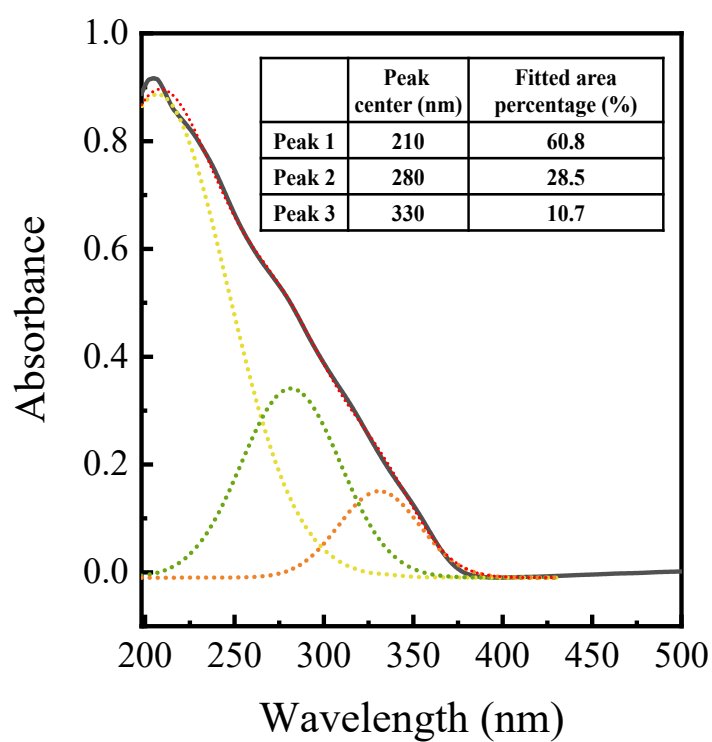

**Fig. S1** The deconvoluted UV-vis spectrum of TS-PN-am.

**Table S1 A comparison of 1-hexene epoxidation over various TS-1 samples in different solvents <sup>a</sup>**

| Catalyst       | Si/Ti | Solvent        | 1-hexene  |                  | TON <sup>b</sup> | H <sub>2</sub> O <sub>2</sub> (%) |      |
|----------------|-------|----------------|-----------|------------------|------------------|-----------------------------------|------|
|                |       |                | conv. (%) | epoxide sel. (%) |                  | conv.                             | eff. |
| - <sup>c</sup> | -     | MeOH           | 0.2       | 50.0             | -                | 9.3                               | 2.1  |
|                |       | MeOH           | 18.0      | 92.1             | 89               | 26.8                              | 67.2 |
| TS             | 40    | MeCN           | 13.9      | 99.0             | 69               | 19.1                              | 72.8 |
|                |       | <i>t</i> -BuOH | 7.8       | 97.7             | 39               | 12.0                              | 65.2 |
|                |       | MeOH           | 23.7      | 97.0             | 123              | 31.3                              | 75.8 |
| TS-P           | 42    | MeCN           | 15.4      | 99.1             | 80               | 20.2                              | 76.4 |
|                |       | <i>t</i> -BuOH | 9.9       | 98.2             | 51               | 14.1                              | 70.3 |
|                |       | MeOH           | 28.7      | 98.1             | 146              | 35.5                              | 81.3 |
| TS-PN          | 41    | MeCN           | 16.7      | 99.0             | 85               | 20.2                              | 82.6 |
|                |       | <i>t</i> -BuOH | 11.2      | 98.0             | 57               | 15.0                              | 74.7 |
|                |       | MeOH           | 35.5      | 98.6             | 180              | 41.7                              | 85.1 |
| TS-PN-am       | 41    | MeCN           | 23.6      | 99.2             | 120              | 28.3                              | 83.4 |
|                |       | <i>t</i> -BuOH | 15.0      | 98.5             | 76               | 18.7                              | 80.3 |

<sup>a</sup> Reaction conditions: cat., 50 mg; 1-hexene, 10 mmol; solvent, 10 mL; H<sub>2</sub>O<sub>2</sub> (30 wt.%), 10 mmol; temp., 333 K; time 2 h.

<sup>b</sup> TON = the mole of product/the mole of Ti sites

<sup>c</sup> Reaction conditions: 1-hexene, 10 mmol; MeOH, 10 mL; H<sub>2</sub>O<sub>2</sub> (30 wt.%), 10 mmol; temp., 333 K; time 2 h.

**Table S2 A comparison of 1-hexene epoxidation over various TS-1 samples <sup>a</sup>**

| Catalyst                           | Si/Ti <sup>b</sup> | 1-hexene  |                  | H <sub>2</sub> O <sub>2</sub> (%) |      |
|------------------------------------|--------------------|-----------|------------------|-----------------------------------|------|
|                                    |                    | conv. (%) | epoxide sel. (%) | conv.                             | eff. |
| TS                                 | 40                 | 18.0      | 92.1             | 26.8                              | 67.2 |
| TS-P                               | 42                 | 23.7      | 97.0             | 31.3                              | 75.8 |
| TS-P-am                            | 42                 | 26.8      | 97.4             | 33.0                              | 81.2 |
| TS-PN                              | 41                 | 28.7      | 98.1             | 35.5                              | 81.3 |
| TS-PN-am                           | 41                 | 35.5      | 98.2             | 41.7                              | 85.1 |
| TS-NH <sub>4</sub> Cl <sup>c</sup> | 40                 | 18.5      | 95.8             | 29.3                              | 63.2 |
| TS-TPAOH <sup>d</sup>              | 40                 | 18.5      | 94.6             | 28.1                              | 65.8 |
| TS-TPA <sup>e</sup>                | 40                 | 23.2      | 95.9             | 31.0                              | 74.8 |

<sup>a</sup> Reaction conditions: cat., 50 mg; 1-hexene, 10 mmol; MeOH, 10 mL; H<sub>2</sub>O<sub>2</sub> (30 wt.%), 10 mmol; temp., 333 K; time, 2 h.

<sup>b</sup> Determined by ICP.

<sup>c</sup> Treatment conditions: NH<sub>4</sub>Cl/Si = 0.06; H<sub>2</sub>O/Si = 18; temp., 443 K; time, 2 d.

<sup>d</sup> Treatment conditions: TPAOH/Si = 0.03; H<sub>2</sub>O/Si = 18; temp., 353 K; time, 1 d.

<sup>e</sup> Treatment conditions: TPA/Si = 0.03; *n*-hexane/Si = 18; temp., 373 K; time, 1 d.

**Table S3 Effect of amines on 1-hexene epoxidation over various TS-1 samples <sup>a</sup>**

| Catalyst                | 1-hexene  |                  | H <sub>2</sub> O <sub>2</sub> (%) |      |
|-------------------------|-----------|------------------|-----------------------------------|------|
|                         | conv. (%) | epoxide sel. (%) | conv.                             | eff. |
| TS-PN-am                | 35.5      | 98.2             | 41.7                              | 85.1 |
| TS-PN                   | 28.7      | 98.1             | 35.5                              | 81.3 |
| TS-PN-TPA <sup>b</sup>  | 33.4      | 98.5             | 40.5                              | 82.4 |
| TS-PN-DPA <sup>c</sup>  | 31.5      | 97.9             | 38.9                              | 80.9 |
| TS-PN-TPA' <sup>d</sup> | 24.3      | 98.6             | 32.2                              | 75.4 |
| TS-PN-DPA' <sup>e</sup> | 20.9      | 98.3             | 27.2                              | 76.9 |

<sup>a</sup> Reaction conditions: cat., 50 mg; 1-hexene, 10 mmol; MeOH, 10 mL; H<sub>2</sub>O<sub>2</sub> (30 wt.%), 10 mmol; temp., 333 K; time, 2 h.

<sup>b</sup> Treatment conditions: TPA/Si = 0.03; *n*-hexane/Si = 18; temp., 373 K; time, 1 d.

<sup>c</sup> Treatment conditions: DPA/Si = 0.03; *n*-hexane/Si = 18; temp., 373 K; time, 1 d.

<sup>d</sup> 0.005 mmol tripropylamine (TPA) was added into the reaction system.

<sup>e</sup> 0.005 mmol dipropylamine (DPA) was added into the reaction system.

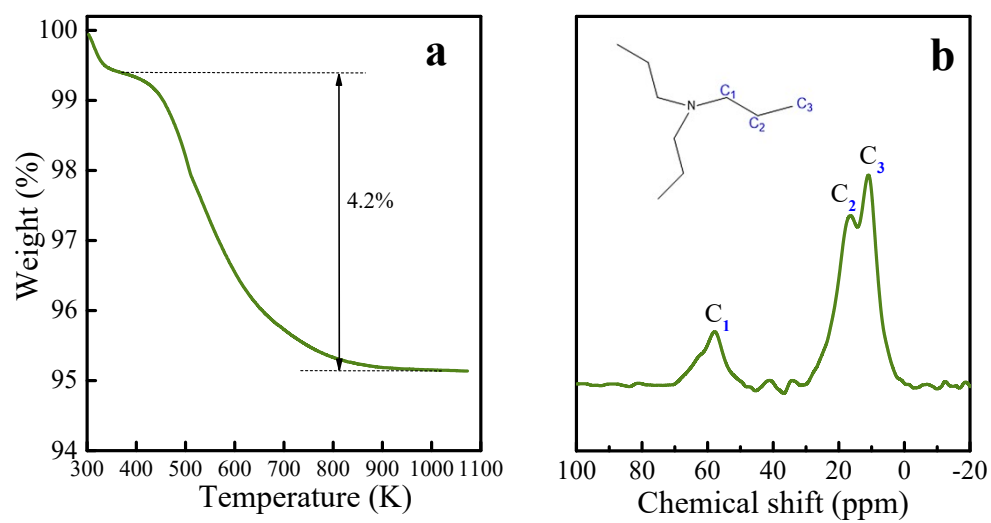

**Fig. S2** TG-DTG curve (a) and  $^{13}\text{C}$  NMR spectrum (b) of TS-PN-TPA.

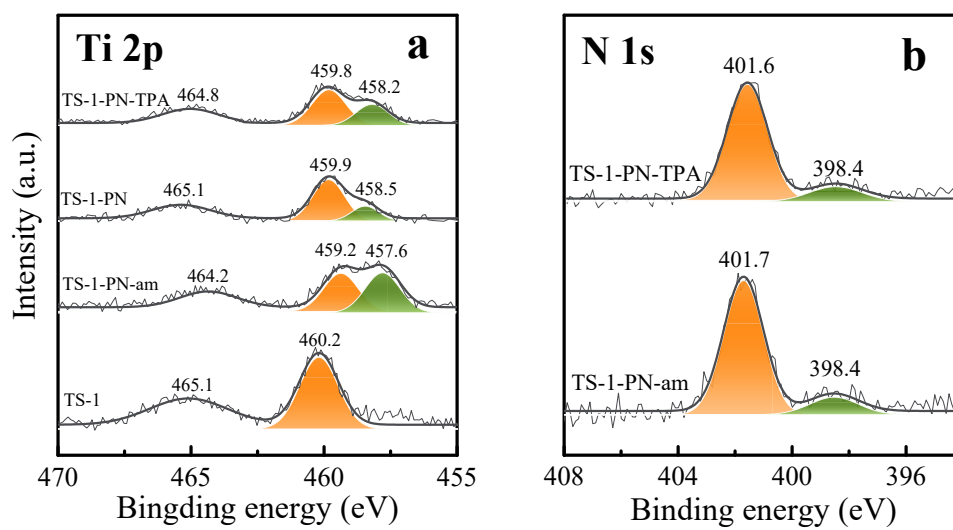

**Fig. S3** Ti 2p (a) and N 1s (b) XPS spectra of various titanositicates.

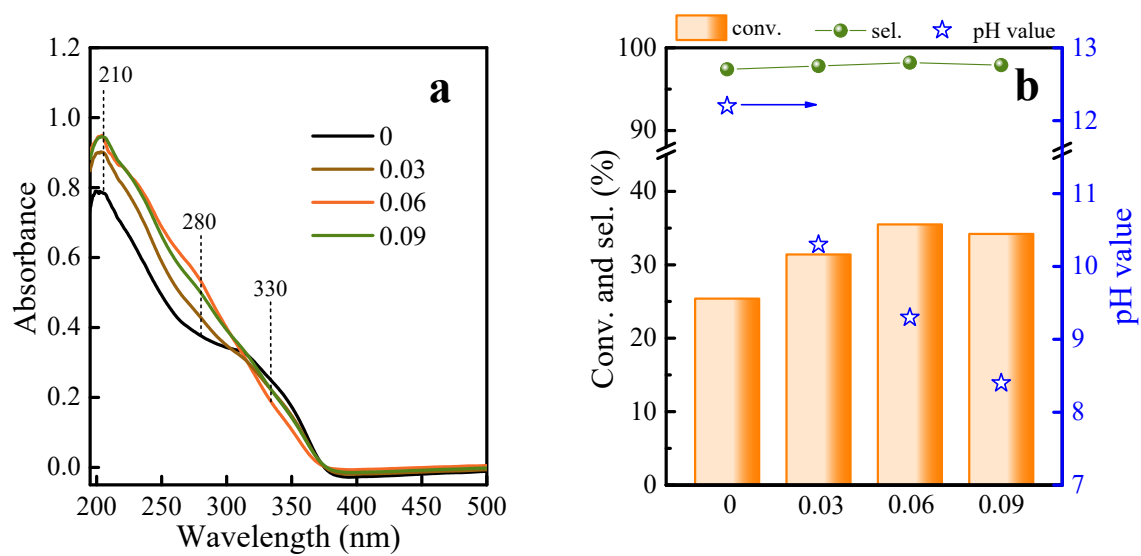

**Fig. S4** UV-vis spectra (a) of TS-1 modified with various molar ratio of  $\text{NH}_4\text{Cl}/\text{Si}$  and the corresponding catalytic performance in 1-hexene epoxidation (b). Reaction conditions see **Table S2**.

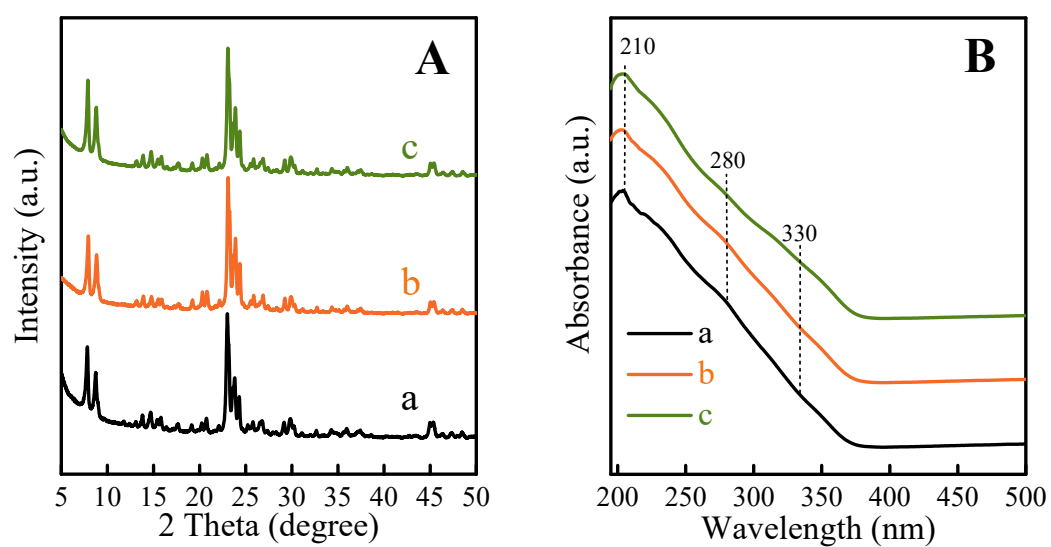

**Fig. S5** XRD patterns (A) and UV-vis spectra (B) of fresh (a), used (b) and regenerated (c) TS-PN-am in the recycle experiments.
